# Supplementary material for: ToxTracker Reporter Cell Lines as a Tool for Mechanism-Based (Geno)Toxicity Screening of Nanoparticles—Metals, Oxides and Quantum Dots
Source: PubMed Central journal article supplement (PMC7023144; doi:10.3390/nano10010110), 2020-01-06
Supplement: nanomaterials-10-00110-s001.pdf [file nanomaterials-10-00110-s001.pdf]

*Supplementary material*

## **ToxTracker reporter cell lines as a tool for mechanism-based (geno)toxicity screening of nanoparticles – metals, oxides and quantum dots**

**Sarah McCarrick<sup>1</sup>, Francesca Cappellini<sup>1</sup>, Amanda Kessler<sup>2</sup>, Nynke Moelijker<sup>3</sup>, Remco Derr<sup>3</sup>, Jonas Hedberg<sup>2</sup>, Susanna Wold<sup>2</sup>, Eva Blomberg<sup>2, 4</sup>, Inger Odnevall Wallinder<sup>2</sup>, Giel Hendriks<sup>3</sup>, Hanna L Karlsson<sup>1</sup>**

<sup>1</sup> Institute of Environmental Medicine, Karolinska Institutet, Stockholm, Sweden.

<sup>2</sup> KTH Royal Institute of Technology, Department of Chemistry, Division of Surface and Corrosion Science, , Stockholm , Sweden.

<sup>3</sup> Toxys, Leiden, The Netherlands.

<sup>4</sup> RISE Research Institutes of Sweden, Division Bioscience and Materials, Stockholm, Sweden

---

### **Supplementary materials and methods – oxide characterization**

#### *Raman spectroscopy*

Raman spectroscopy was performed using a Horiba Yvon Jobin HR800 Raman spectrometer. Dry powders were studied using a 785 nm laser and a 50X microscope objective. The powders were checked using an optical microscope for laser beam-induced damages.

#### *X-ray photoelectron spectroscopy*

X-ray photoelectron spectroscopy (Kratos AXIS UltraDLD X-ray photoelectron spectrometer, Kratos Analytical, Manchester, UK) studies were performed on dry powder applied onto carbon tape. High-resolution detailed spectra (pass energy 20 eV) were acquired using monochromatic Al K $\alpha$  X-ray source on Cr 2p, Mn 2p, Sn 3d, Sb 3d, V 4f and O 1s. All binding energies were corrected versus the C 1s adventitious peak at 285.0 eV.

#### *X-ray Diffraction*

PANalytical X'Pert PRO diffractometer (CuK $\alpha$ 1 $\lambda$  = 1.54060 Å, CuK $\alpha$ 2 $\lambda$  = 1.54443 Å), generator settings at 30mA and 45kV, 2 $\theta$  range from 25 to 130° with step size 0.01°. Dry powders were studied. Several runs were conducted and averaged to produce spectra with high signal to noise ratio.

### **Supplementary results - oxide characterization**

#### *Manganese (Mn) and manganese oxide (Mn<sub>3</sub>O<sub>4</sub>) NPs*

XRD spectra of Mn and Mn<sub>3</sub>O<sub>4</sub> NPs (Figure S1) showing the presence of MnO and Mn metal peaks for the Mn NPs and the diffraction pattern of Mn<sub>3</sub>O<sub>4</sub> and MnO for the Mn<sub>3</sub>O<sub>4</sub> NPs. The Mn NPs

displayed in addition vibrational Raman modes at 280, 309, 364, 468, and 650  $\text{cm}^{-1}$ , and the  $\text{Mn}_3\text{O}_4$  NPs essentially the same bands. All observed bands indicate  $\text{Mn}_3\text{O}_4$  [25], though the presence of  $\text{Mn}_2\text{O}_3$  cannot be excluded due to peak overlap. The Mn NPs have earlier been characterized by means of XPS indicating a surface oxide composed of  $\text{MnO}_2$  and  $\text{Mn}_2\text{O}_3/\text{Mn}_3\text{O}_4$ . The presence of  $\text{MnO}_2$  and  $\text{Mn}_2\text{O}_3$  was supported by cyclic voltammetry (CV) measurements and MnO by means of XRD findings [26].

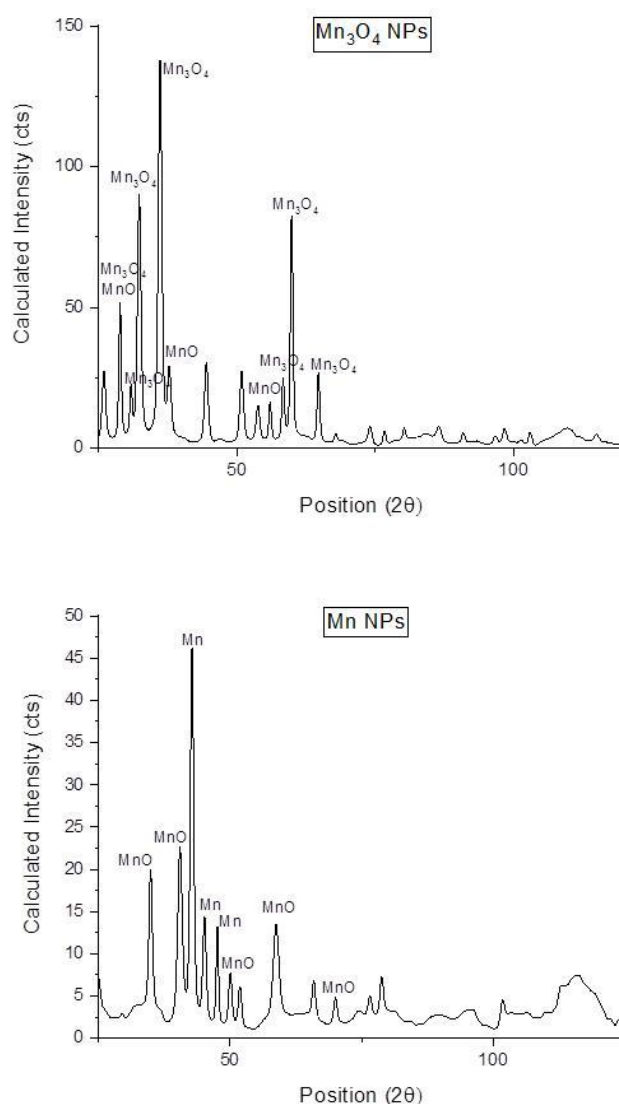

**Figure S1.** XRD spectra of Mn NPs [3] and  $\text{Mn}_3\text{O}_4$  NPs (bottom).

#### *Tin [4] and tin oxide ( $\text{SnO}_2$ ) NPs*

XRD results for Sn- and  $\text{SnO}_2$  NPs are presented in Figure S2. Diffraction peaks corresponding to metallic Sn and the strongest peaks of SnO (minor intensity) were observed for the Sn NPs. The  $\text{SnO}_2$  NPs only revealed the main peaks corresponding to  $\text{SnO}_2$ . The major peaks are marked according to reported assignments [30,31] XPS results imply  $\text{SnO}_2$  (binding energy of Sn 3d at 486.4–486.9 eV) [27]

to be a main component of the outermost surface on both the Sn- and the SnO<sub>2</sub> NPs. However, the presence of SnO cannot be excluded due to peak overlap. The metallic signal (484.5 eV) for the Sn NPs implies a thin surface oxide (< 5-10 nm).

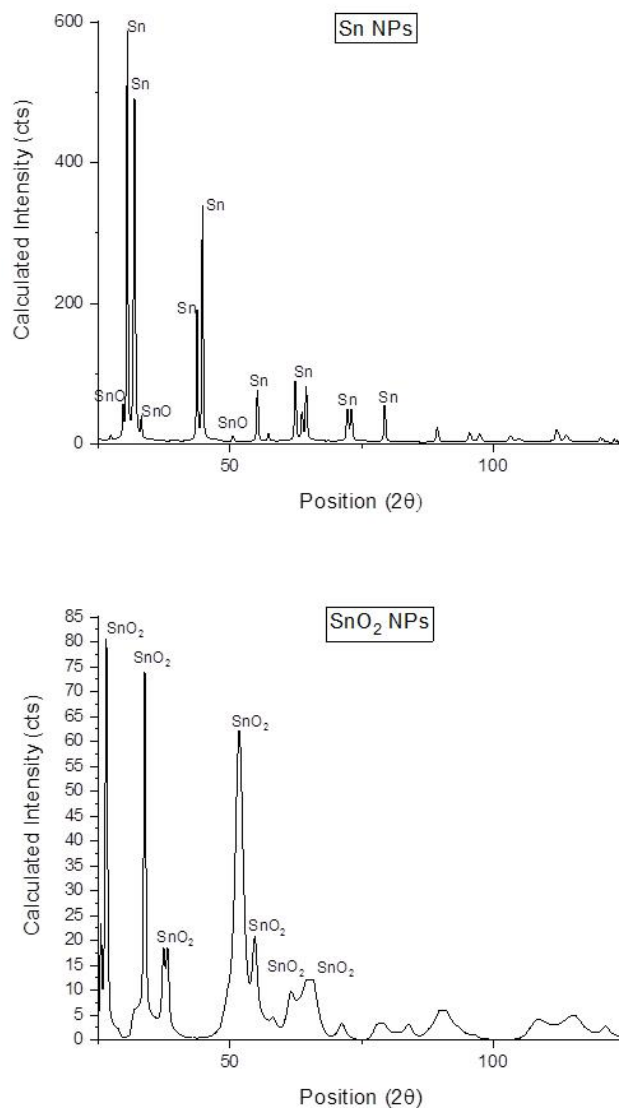

**Figure S2.** XRD results for Sn NPs [3], and SnO<sub>2</sub> NPs (bottom).

#### *Antimony (Sb) and antimony oxide (Sb<sub>2</sub>O<sub>3</sub>)*

Raman spectra of Sb- and Sb<sub>2</sub>O<sub>3</sub> NPs are displayed in Figure S3. The observed Raman bands at approximately 450, 370, 250 and 190 cm<sup>-1</sup> correspond to Sb<sub>2</sub>O<sub>3</sub> for both NPs [32]. The small difference in peak frequencies of the Sb- and Sb<sub>2</sub>O<sub>3</sub> Raman bands may e.g. be attributed to differences in particle size [34]. The XPS results imply the presence of Sb<sub>2</sub>O<sub>3</sub> on both the Sb- and the Sb<sub>2</sub>O<sub>3</sub> NPs, based on observed binding energies at 538.8-539.0 eV [33]. The metallic signal observed for the Sb NPs implies a thin surface oxide, < 5-10 nm.

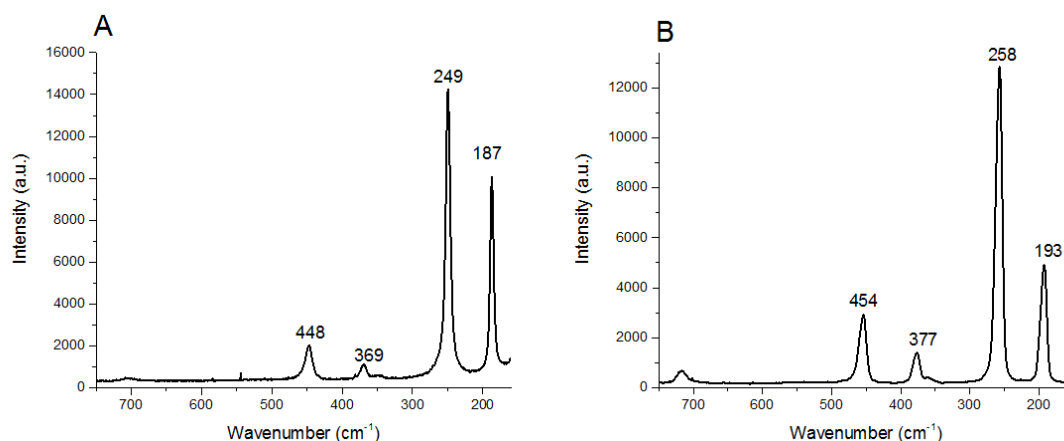

**Figure S3.** Raman spectra of Sb NPs (A) and Sb<sub>2</sub>O<sub>3</sub> NPs (B).

#### *Vanadium (V) and vanadium oxide (V<sub>2</sub>O<sub>5</sub>) NPs*

The V-based NPs were characterized by means of XPS. The results imply the presence of both VO<sub>2</sub> and V<sub>2</sub>O<sub>5</sub> oxides in the outermost surface of both the V- and the V<sub>2</sub>O<sub>5</sub> NPs (516.2-516.4 eV and 517.4-517.9 eV, respectively [28]). The lack of metal signal of the V NPs indicates a surface oxide thicker than 5-10 nm.

#### *Chromium (Cr) and chromium oxide (Cr<sub>2</sub>O<sub>3</sub>) NPs*

XPS results indicate the presence of Cr<sub>2</sub>O<sub>3</sub> in the surface oxide for both Cr and Cr<sub>2</sub>O<sub>3</sub> NPs, as judged from the Cr 2p peaks at 578-581.5 eV [29]. The Cr NPs showed in addition also metallic Cr signal (binding energy 574.8 eV) that implies a thin surface oxide, < 5-10 nm [29].

## Supplementary results – Viability of CdTe QDs

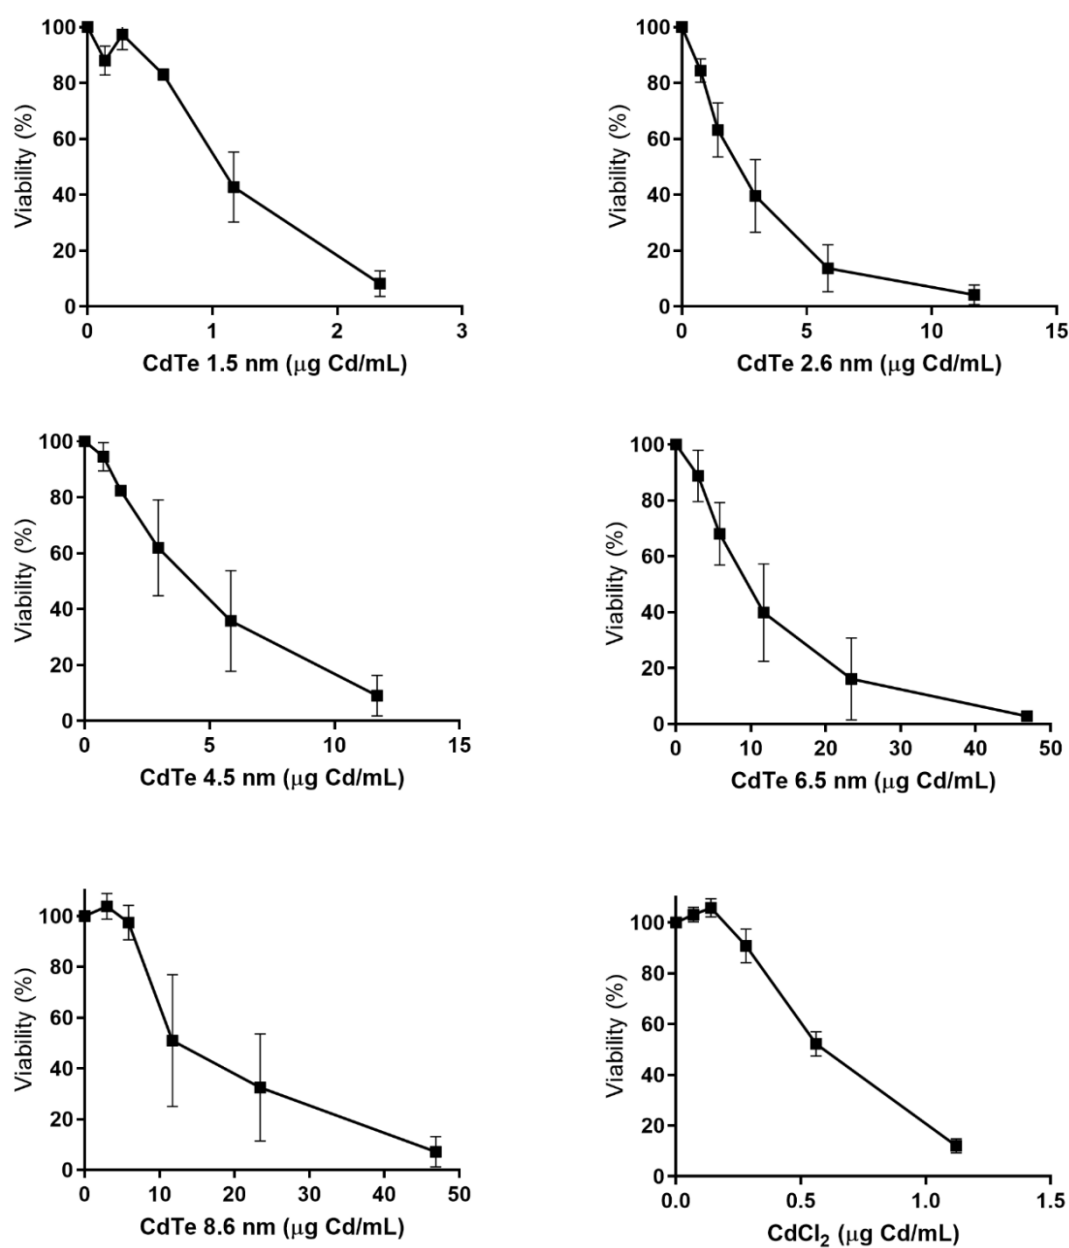

**Figure S4.** Cytotoxicity in mES cells following 24 h exposure to CdTe QDs of 5 different sizes as well as CdCl<sub>2</sub>. Cytotoxicity was determined by measuring the fraction of intact cells following exposure using flow cytometry. The results are presented as mean ± standard error of the mean of three or four independent experiments (n=3-4).

## Supplementary results – Maximum ToxTracker activation

**Table S1.** Maximum ToxTracker activation observed in response to metal and metal oxide NPs as well as CdTe QDs of various sizes and CdCl<sub>2</sub>. Values correspond to maximum ToxTracker activation at viability levels above 25 %. Asterisks (\*) indicate an induction observed at a viability level below 50 %.

| NP/<br>compound                | Oxidative stress |              | DNA damage  |              | Cellular stress |             |
|--------------------------------|------------------|--------------|-------------|--------------|-----------------|-------------|
|                                | Srxn             | Blvrb        | Rtkn        | Bscl2        | Ddit3           | Btg         |
| Ag                             | 2.67 ± 0.29      | 1.49 ± 0.09  | 1.06 ± 0.05 | 1.04 ± 0.03  | 1.15 ± 0.03     | 0.98 ± 0.03 |
| Au                             | 0.96 ± 0.02      | 0.99 ± 0.01  | 0.96 ± 0.03 | 1.02 ± 0.02  | 1.03 ± 0.02     | 0.99 ± 0.01 |
| CdCl <sub>2</sub>              | 9.21 ± 2.68      | 3.53 ± 0.96  | 1.06 ± 0.18 | 1.19 ± 0.09  | 2.11 ± 0.9      | 1.27 ± 0.21 |
| CdTeQDs 1.5                    | 5.37 ± 0.54*     | 1.83 ± 0.2*  | 1.64 ± 0.29 | 1.28 ± 0.03  | 1.13 ± 0.09     | 1.26 ± 0.08 |
| CdTeQDs 2.6                    | 5.39 ± 1.03*     | 2.03 ± 0.15* | 2.06 ± 0.21 | 1.54 ± 0.04* | 2.02 ± 0.24*    | 1.71 ± 0.07 |
| CdTeQDs 4.5                    | 4.28 ± 0.55*     | 1.72 ± 0.2   | 1.51 ± 0.14 | 1.26 ± 0.13  | 2.92 ± 1.5*     | 1.28 ± 0.07 |
| CdTeQDs 6.5                    | 4.88 ± 0.88*     | 2.05 ± 0.28* | 1.65 ± 0.14 | 1.53 ± 0.03* | 1.62 ± 0.32*    | 1.43 ± 0.07 |
| CdTeQDs8.6                     | 4.39 ± 1.01      | 2.01 ± 0.36  | 1.28 ± 0.09 | 1.29 ± 0.14* | 2.82 ± 0.31*    | 1.35 ± 0.04 |
| Cr                             | 1.07 ± 0.16      | 1.08 ± 0.07  | 1 ± 0.08    | 1 ± 0.04     | 1.03 ± 0.13     | 0.92 ± 0.07 |
| Cr <sub>2</sub> O <sub>3</sub> | 1.71 ± 0.26      | 1.44 ± 0.08  | 1.69 ± 0.18 | 1.06 ± 0.04  | 1.04 ± 0.06     | 1.18 ± 0.04 |
| Mn                             | 19.96 ± 5.11     | 2.02 ± 0.13  | 3.53 ± 0.41 | 2.34 ± 0.13  | 7.77 ± 1.06     | 3.99 ± 0.47 |
| Mn <sub>3</sub> O <sub>4</sub> | 21.91 ± 4.51     | 1.39 ± 0.12  | 3.31 ± 0.41 | 1.78 ± 0.13  | 4.08 ± 0.54     | 3.86 ± 0.32 |
| Pt                             | 1.78 ± 0.05      | 1.53 ± 0.07  | 0.96 ± 0.03 | 1.12 ± 0.02  | 0.95 ± 0.04     | 1.01 ± 0.03 |
| Sb                             | 7.13 ± 1.73*     | 4.71 ± 0.71  | 0.88 ± 0.05 | 1.23 ± 0.03  | 5.28 ± 1.09*    | 1.21 ± 0.13 |
| Sb <sub>2</sub> O <sub>3</sub> | 10.64 ± 1.51     | 4.66 ± 0.63  | 0.91 ± 0.03 | 1.19 ± 0.03  | 4.25 ± 0.76*    | 1.16 ± 0.12 |
| Sn                             | 11.98 ± 3.19*    | 4.5 ± 0.62*  | 1.32 ± 0.41 | 1.24 ± 0.12  | 2.06 ± 0.32*    | 1.8 ± 0.37  |
| SnO <sub>2</sub>               | 1.94 ± 0.53      | 1.13 ± 0.11  | 1.05 ± 0.06 | 1.04 ± 0.04  | 1.12 ± 0.08     | 1.03 ± 0.03 |
| V                              | 1.34 ± 0.1       | 1.23 ± 0.07  | 1.47 ± 0.12 | 1.02 ± 0.08  | 0.94 ± 0.16     | 1.14 ± 0.09 |
| V <sub>2</sub> O <sub>5</sub>  | 2.53 ± 0.21*     | 2.29 ± 0.11  | 2.34 ± 0.37 | 1.15 ± 0.08  | 1.55 ± 0.09     | 1.85 ± 0.16 |

## Supplementary results – dose metric modelling analysis

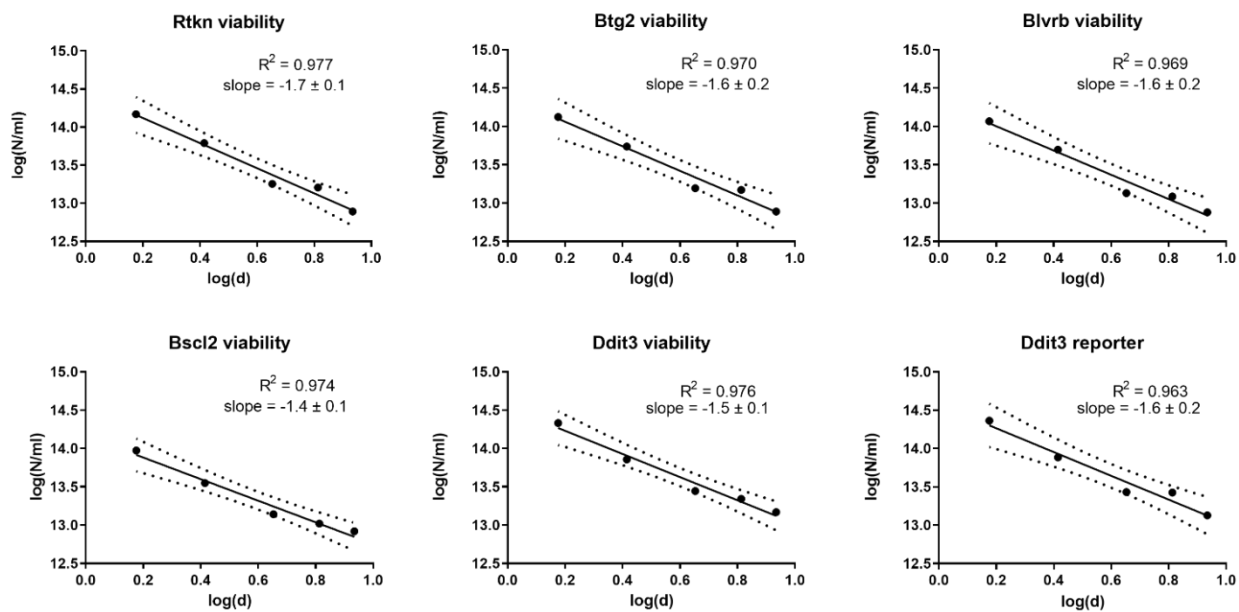

**Figure S5.** Equi-response curves for CdTe QDs (1.5, 2.6, 4.5, 6.5, 8.6 nm) representing a 20 % decrease in cell viability compared to control or a 1.5-fold increase in reporter activation. Slopes plotted according to Delmaar et al. [24] where Numb stands for number of particles and d stands for diameter of the particle (nm).
